# Supplementary material for: A mutation in the FZL gene of Arabidopsis causing alteration in chloroplast morphology results in a lesion mimic phenotype
Source: PubMed Central journal article supplement (PMC3808314; doi:10.1093/jxb/ert237), 2013-08-19
Supplement: supp_ert237_jexbot099465_file001.pdf [file supp_ert237_jexbot099465_file001.pdf]

“A mutation in the *FZL* gene of *Arabidopsis* causing alteration in chloroplast morphology results in a lesion mimic phenotype”.

Michela Landoni, Alessandra De Francesco, Silvia Bellatti, Massimo Delledonne, Alberto Ferrarini, Luca Venturini, Roberto Pilu and Chiara Tonelli

**Supplemental Table S1. Oligonucleotide primers used for RT-PCR analysis.**

| <b>Gene name</b> | <b>Primer</b> | <b>Sequence</b>                        |
|------------------|---------------|----------------------------------------|
| <i>Tsβ1</i>      | Tsβ1F         | 5'-CTCATGGCCGCCGGATCTTGA-3'            |
|                  | Tsβ1R         | 5'-CTTGTCTCTCCATATCTTGAGCA -3'         |
| <i>FZL</i>       | 3160 16F      | 5'- GTGGGCTTGGAGCTGCAG -3'             |
|                  | 3160 16R      | 5'- GTCGGAAGTGGCAGGTATTATTC -3'        |
|                  | 3160 9F       | 5'-GCACTTCTTGGGAAGAGATACCTG-3'         |
|                  | 3160 9R       | 5'- CTCACGAGCATCACGATAGATATC -3'       |
| <i>PR1</i>       | FPR1          | 5'-ATGAATTTTACTGGCTATTCTCGATTTTTTA -3' |
|                  | RPR1          | 5'-TTAGTATGGCTTCTCGTTCACATAATT-3'      |
| <i>Pal1</i>      | FPal1         | 5'-CTTACTACTGGAGTCAATGGTGAG-3'         |
|                  | RPal1         | 5'-TCCACTCGTTGAGATATTCCATC-3'          |
| <i>PRXc</i>      | FPRXc         | 5'-CAGAAGGACGATCGAGACCAA-3'            |
|                  | RPRXc         | 5'-TGACGCATCCATCTTGTTAGACA-3'          |
| <i>PDF1.2</i>    | FPDF1.2       | 5'-TTAACATGGGACGTAACAGATACACTT-3'      |
|                  | RPDF1.2       | 5'-TTAACATGGGACGTAACAGATACACTT-3'      |
| <i>SAG12</i>     | FSAG12        | 5'-GGCACATCGAGTGGATGACT-3'             |

|               |          |                                   |
|---------------|----------|-----------------------------------|
|               | RSAG12   | 5'-TGCCTTCATCAGTGCTTGCT-3'        |
| <i>SAG13</i>  | FSAG13   | 5'-GGCACATCGAGTGGATGACT-3'        |
|               | RSAG13   | 5'-CCACAAGCGGTGAGACTTCA-3'        |
| <i>PAD3</i>   | PAD3F    | 5'-ATGTCGGTTTTCTCTGTTTCCT-3'      |
|               | PAD3R    | 5'-CCTTCTTTCAAGTTCTTCACCACTG-3'   |
| <i>Athsr3</i> | Athsr3F2 | 5'-GTTGGCCTACCGATTTGTTCTTCCAG-3'  |
|               | Athsr3R2 | 5'-ACGGTGATGAGCCTCGTCAGCA-3'      |
| <i>EDS1</i>   | EDS1F2   | 5'-CAAGGAAGAAGCAGGAGCAGTCGTA-3'   |
|               | EDS1R2   | 5'-GTACCGGCGGGTCTATAAGGACT-3'     |
| <i>EDS16</i>  | EDS16F   | 5'- CCGACATTGATCCCATTGCTTGGCTA-3' |
|               | EDS16R   | 5'- CTCCTTCGTGAGTTTCCCTGCCAATT-3' |

**Supplemental table S2. Oligonucleotide primers used for RealTime RT-PCR analysis.**

| <b>Gene name</b> | <b>Primer</b> | <b>Sequence</b>                 |
|------------------|---------------|---------------------------------|
| <i>Actin</i>     | AtACT2F       | 5'-TGCTTCTCCATTTGTTTGTTTC-3'    |
|                  | AtACT2R       | 5'-GGCATCAATTCGATCACTCA-3'      |
| <i>PR1</i>       | PR1F2         | 5'-GGAGCTACGCAGAACAACACTAAGA-3' |
|                  | PR1R2         | 5'-CCACCATTGTTACACCTCACTTT-3'   |
| <i>PRXc</i>      | PRXcF-2       | 5'-CCTCCTGCCAAAGTGACAGAT-3'     |
|                  | PRXcR-2       | 5'-TGACGCATCCATCTTGTTAGACA-3'   |
| <i>SAG13</i>     | SAG13-1F-2    | 5'-TTCGTCCTCCTCGGTATTGGG-3'     |
|                  | SAG13-1R-2    | 5'-GTGAGAGATGGAAAGCTGACTCGA-3'  |
| <i>EDS16</i>     | EDS16-2F      | 5'- GATAGAGGAATGTATGCGGGAC-3'   |
|                  | EDS16-2R      | 5'- GGTAACAGAGAACCATGATGTCAC-3' |
